# Supplementary material for: Catalytic effect of (Ti0.85Zr0.15)1.05Mn1.2Cr0.6V0.1Cu0.1on hydrogen storage properties of ultrafine magnesium particles
Source: Royal Society of Chemistry journal article supplement (doi:10.1039/c7ra05461k), 2017-01-01
Supplement: c7ra05461k1.pdf [file c7ra05461k1.pdf]

**Supplementary Materials**  
**Catalytic Effect of  $(\text{Ti}_{0.85}\text{Zr}_{0.15})_{1.05}\text{Mn}_{1.2}\text{Cr}_{0.6}\text{V}_{0.1}\text{Cu}_{0.1}$  on hydrogen**  
**storage properties of ultrafine Mg particles**

Peng Liu<sup>a</sup>, Xiujuan Ma<sup>a</sup>, Xiubo Xie<sup>a</sup>, Xingguo Li<sup>b</sup> and Tong Liu<sup>a\*</sup>

<sup>a</sup>Key Laboratory of Aerospace Materials and Performance (Ministry of Education),  
School of Materials Science and Engineering, Beihang University, No.37 Xueyuan  
Road, Beijing, 100191, China

<sup>b</sup>Beijing National Laboratory for Molecular Sciences (BNLMS), The State Key  
Laboratory of Rare Earth Materials Chemistry and Applications, College of  
Chemistry and Molecular Engineering, Peking University, Beijing 100871, China

\*Corresponding author: Email address: tongliu@buaa.edu.cn; Tel/fax: +86 010  
82316192

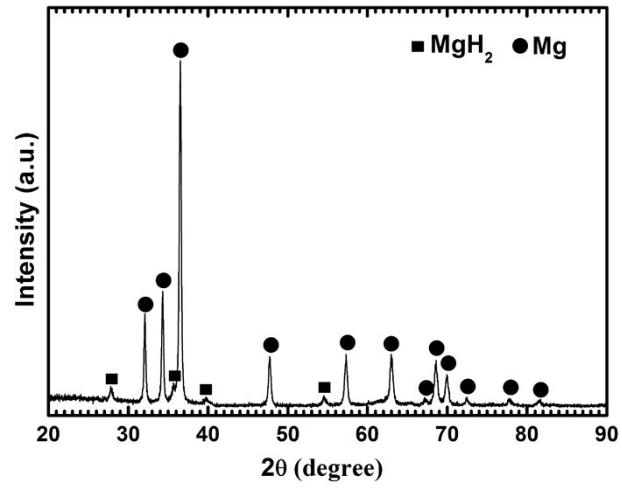

**Fig. S1.** XRD patterns of the as-milled Mg UFPs.

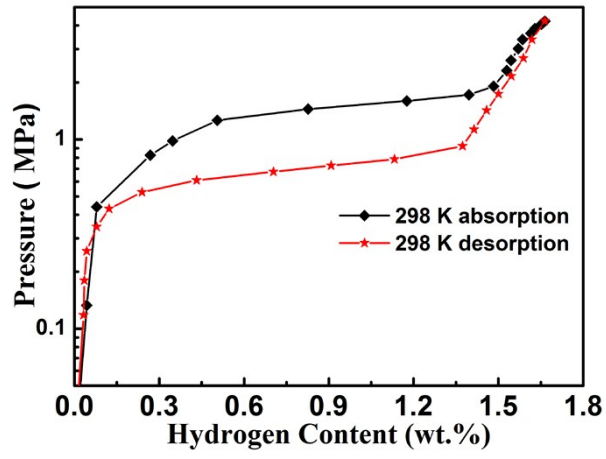

**Fig. S2.** P-C isotherm curves at 298 K for the  $(\text{Ti}_{0.85}\text{Zr}_{0.15})_{1.05}\text{Mn}_{1.2}\text{Cr}_{0.6}\text{V}_{0.1}\text{Cu}_{0.1}$  alloy.

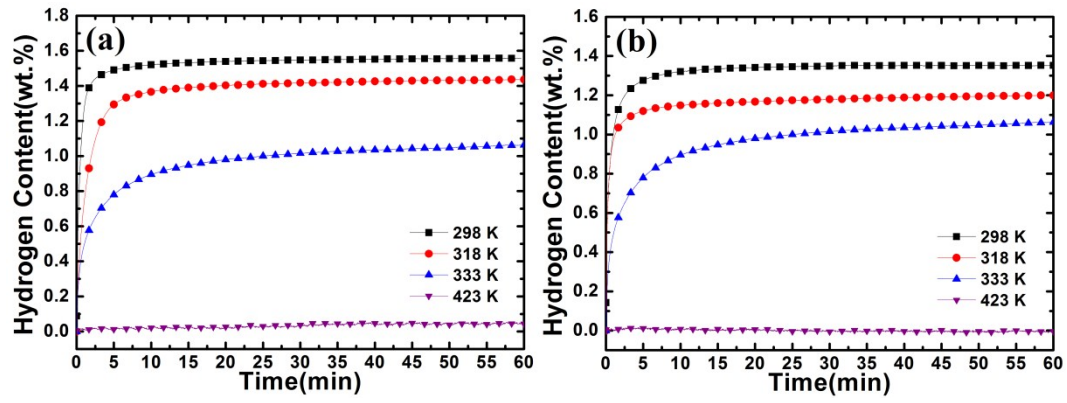

**Fig. S3.** (a) Hydrogen absorption curves under 4 MPa hydrogen pressure; (b) desorption curves under 100 Pa of the  $(\text{Ti}_{0.85}\text{Zr}_{0.15})_{1.05}\text{Mn}_{1.2}\text{Cr}_{0.6}\text{V}_{0.1}\text{Cu}_{0.1}$  alloy.
